# Supplementary material for: Early Predictors of Objective Response in Patients with Hepatocellular Carcinoma Undergoing Lenvatinib Treatment
Source: PubMed Central journal article supplement (PMC7225985; doi:10.3390/cancers12040779), 2020-03-25
Supplement: cancers-12-00779-s001.pdf [file cancers-12-00779-s001.pdf]

Supplementary Materilas

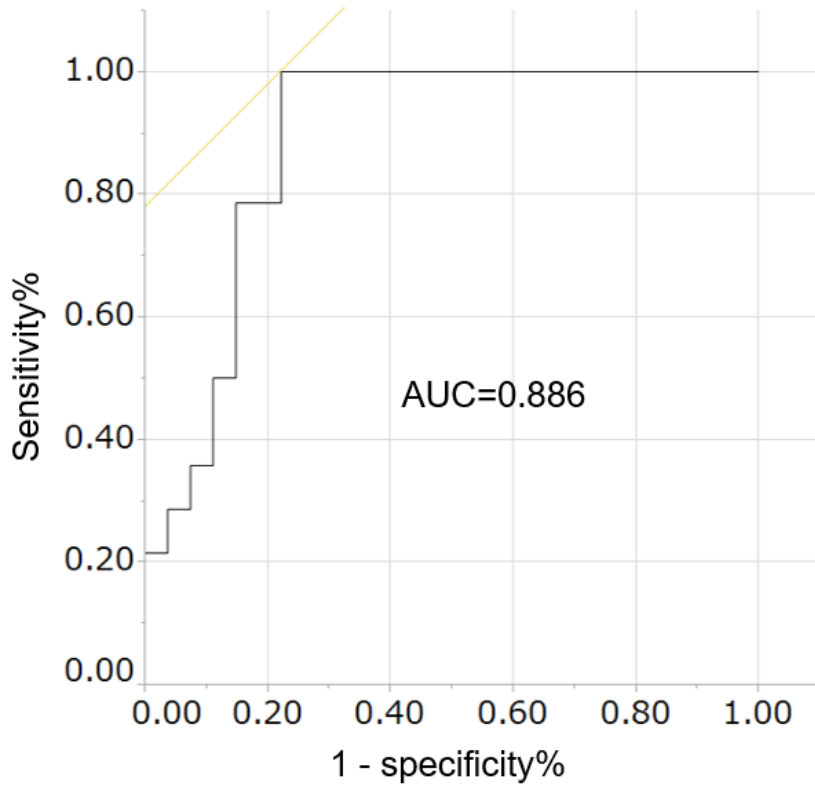

**Figure S1.** The receiver-operation characteristic (ROC) analysis for objective response of the rate of change in alpha-fetoprotein.

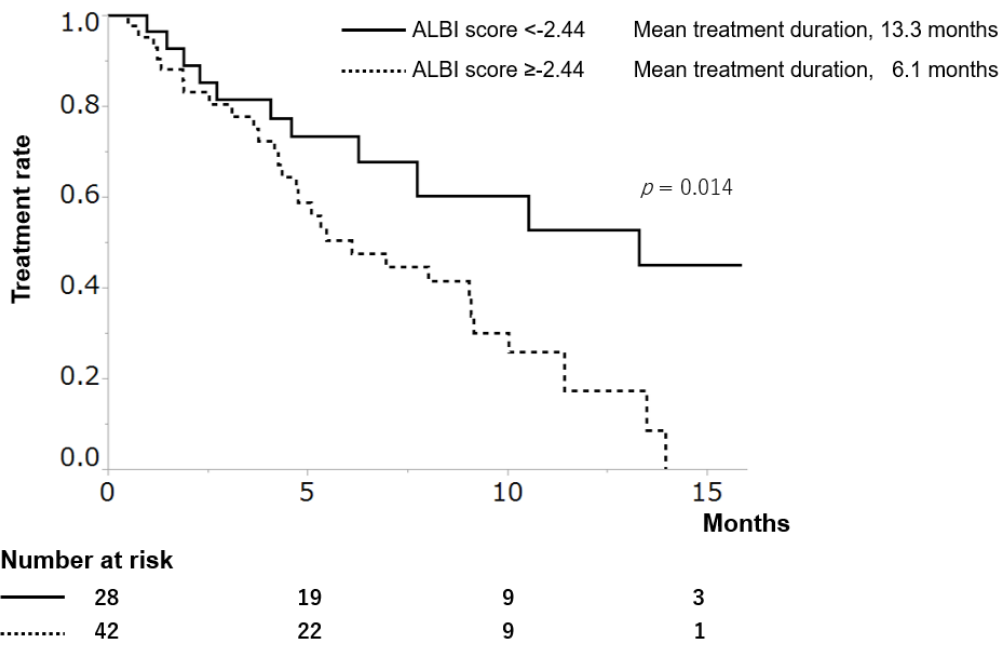

**Figure S2** Cumulative time to treatment failure classified as two groups according to baseline albumin-bilirubin (ALBI) score, those with <-2.44 and ≥2.44.

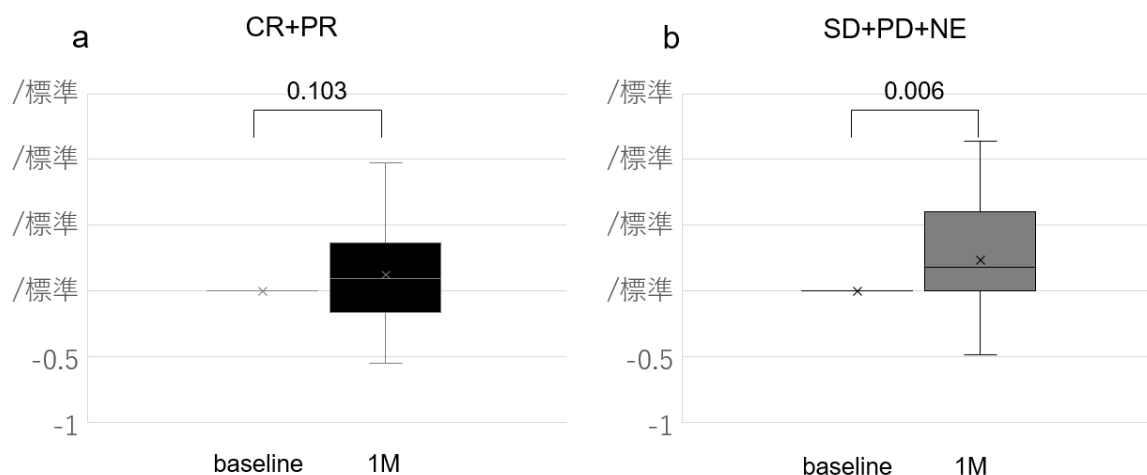

**Figure S3.** Change in albumin-bilirubin (ALBI) score from baseline to one month after treatment initiation according to the imaging response after propensity score matching.

**Table S1.** Patient characteristics between low-alpha-fetoprotein (AFP) group and high-AFP group.

| Factor                                  | Low-AFP Group      | High-AFP Group      | <i>p</i> -value |
|-----------------------------------------|--------------------|---------------------|-----------------|
| Age                                     | 73.8 ± 8.0         | 72.1 ± 9.8          | 0.452           |
| Sex male/female                         | 22/7               | 28/13               | 0.595           |
| BW [kg]                                 | 57.9 ± 12.0        | 57.9 ± 12.4         | 0.988           |
| Etiology C/B/Alc/N                      | 12/5/3/9           | 19/9/4/9            | 0.841           |
| Child-Pugh class A/B                    | 23/6               | 34/7                | 0.761           |
| ALBI grade 1/2/3                        | 8/20/1             | 10/28/3             | 0.916           |
| PS 0/1/2                                | 26/2/1             | 32/9/0              | 0.126           |
| BCLC <sup>a</sup> A/B/C                 | 1/14/14            | 2/15/24             | 0.616           |
| Vp 0/1/2/3/4                            | 26/1/1/0/1         | 29/4/2/6/0          | 0.114           |
| MVI absence/presence                    | 26/3               | 29/12               | 0.078           |
| EHS absence/presence                    | 24/5               | 27/14               | 0.173           |
| Tumor number                            | 3 (1–7.5)          | 5 (2–9)             | 0.356           |
| Tumor size [mm]                         | 30.0 (20.5–43.5)   | 25.0 (17.0–54.0)    | 0.547           |
| AFP [ng/mL]                             | 3.3 (2.3–4.4)      | 360.0 (16.5–2074.0) | <0.001          |
| DCP [mAU/mL]                            | 108.0 (23.7–511.0) | 514.5 (50.3–5798.5) | 0.012           |
| Prior treatment (+/-)                   | 27/2               | 34/7                | 0.289           |
| Prior treatment of MTA (+/-): SORA/REGO | 1/28: 1/1          | 5/36: 5/2           | 0.389           |

Values are expressed as numbers, mean ± standard deviation, or median (interquartile range). C, Hepatitis C virus; B, Hepatitis B virus; Alc, Alcohol; N, non-B nonC; ALBI, albumin-bilirubin; MVI, Macrovascular invasion; EHS, Extrahepatic spread; AFP, alpha-fetoprotein; DCP, des-gamma-carboxy prothrombin; SORA, sorafenib; REGO, regorafenib. <sup>a</sup> BCLC, The Barcelona Clinic Liver Cancer staging.

**Table S2.** Patient characteristics between imaging responders and non-responders.

| Factor                  | Responder (29)      | Non-Responder (41)  | <i>p</i> -value |
|-------------------------|---------------------|---------------------|-----------------|
| Age                     | 72.6 ± 9.5          | 73.0 ± 8.8          | 0.882           |
| Sex male/female         | 23/6                | 27/14               | 0.287           |
| BW [kg]                 | 58.3 ± 11.7         | 57.5 ± 12.6         | 0.782           |
| Etiology C/B/Alc/N      | 11/6/2/10           | 20/8/5/8            | 0.490           |
| Child-Pugh class A/B    | 26/3                | 31/10               | 0.213           |
| ALBI score              | -2.42 ± 0.49        | -2.17 ± 0.54        | 0.047           |
| ALBI grade 1/2/3        | 10/18/1             | 8/30/3              | 0.327           |
| PS 0/1/2                | 25/3/1              | 33/8/0              | 0.249           |
| BCLC <sup>a</sup> A/B/C | 2/12/15             | 1/17/23             | 0.659           |
| Vp 0/1/2/3/4            | 23/1/2/3/0          | 32/4/1/3/1          | 0.547           |
| MVI absence/presence    | 23/6                | 32/9                | 1.000           |
| EHS absence/presence    | 23/6                | 28/13               | 0.415           |
| Tumor number            | 3 (1–6)             | 6 (2–10)            | 0.114           |
| Tumor size [mm]         | 28 (18.5–44.0)      | 30.0 (20.0–45.5)    | 0.793           |
| AFP [ng/mL]             | 9.4 (3.0–433.5)     | 16.7 (4.4–865.5)    | 0.198           |
| DCP [mAU/mL]            | 254.0 (45.5–1076.5) | 319.1 (28.8–3029.3) | 0.908           |

Values are expressed as numbers, mean ± standard deviation, or median (interquartile range). C, Hepatitis C virus; B, Hepatitis B virus; Alc, Alcohol; N, non-B nonC; ALBI, albumin-bilirubin; MVI, Macrovascular invasion; EHS, Extrahepatic spread; AFP, alpha-fetoprotein; DCP, des-gamma-carboxy prothrombin; <sup>a</sup> BCLC, The Barcelona Clinic Liver Cancer staging.

**Table S3.** Patient characteristics after propensity score matching between imaging responders and non-responders.

| Factor                  | Responder (27) | Non-Responder (27) | <i>p</i> value |
|-------------------------|----------------|--------------------|----------------|
| Age                     | 72.8 ± 9,9     | 72.8 ± 9.1         | 0.989          |
| Sex male/female         | 21/6           | 17/10              | 0.372          |
| BW [kg]                 | 58.3 ± 12.1    | 56.7 ± 11.1        | 0.609          |
| Etiology C/B/Alc/N      | 11/6/1/9       | 16/3/3/5           | 0.245          |
| Child-Pugh class A/B    | 24/3           | 20/7               | 0.294          |
| ALBI score              | -2.36 ± 0.45   | -2.30 ± 0.56       | 0.635          |
| ALBI grade 1/2/3        | 8/18/1         | 8/18/1             | 1.000          |
| PS 0/1/2                | 23/3/1         | 23/4/0             | 0.465          |
| BCLC <sup>a</sup> A/B/C | 2/12/13        | 1/14/12            | 0.766          |
| Vp 0/1/2/3/4            | 21/1/2/3/0     | 22/3/1/0/1         | 0.138          |
| MVI absence/presence    | 21/6           | 22/5               | 1.000          |
| EHS absence/presence    | 23/4           | 21/6               | 0.728          |

|                 |                     |                     |       |
|-----------------|---------------------|---------------------|-------|
| Tumor number    | 3 (1–6)             | 5 (1–10)            | 0.305 |
| Tumor size [mm] | 30.0 (20.0–46.0)    | 27.0 (20.0–40.0)    | 0.697 |
| AFP [ng/mL]     | 9.4 (2.8–360.0)     | 15.4 (4.3–582.8)    | 0.359 |
| DCP [mAU/mL]    | 254.0 (50.9–669.0)) | 197.5 (25.0–1481.3) | 0.522 |

Values are expressed as numbers, mean  $\pm$  standard deviation, or median (interquartile range). C, Hepatitis C virus; B, Hepatitis B virus; Alc, Alcohol; N, non-B nonC; ALBI, albumin-bilirubin; MVI, Macrovascular invasion; EHS, Extrahepatic spread; AFP, alpha-fetoprotein; DCP, des-gamma-carboxy prothrombin; <sup>a</sup> BCLC, The Barcelona Clinic Liver Cancer staging.
